# Supplementary material
Source: Research Square preprint supplement (doi:10.21203/rs.3.rs-9171349/v1)
Supplement: Supplementary file 1 [file 572c2b8ad667c9878c66c091.docx]

**Title: Design Matters: Structural Variation in Experimental Huts Significantly Alters Entomological Endpoints in Insecticide Treated Net (ITN) Evaluation ––A Comparative Experimental Hut Trial Using a Latin Square Design in Tanzania and Côte d’Ivoire**

**[1]Table 1 Exophily (exit rates) by hut type based on analysis restricted to control nets**

| **Hut type** | **Control Exit** | **Margins** | **Odds ratio** |
| --- | --- | --- | --- |
| East African Hut | 0.75 (122/163) | 0.77 (0.70, 0.83) | 1.00 (., .), p= . |
| Ifakara Hut | 0.87 (465/537) | 0.86 (0.83, 0.90) | 1.96 (1.18, 3.27), p= 0.0096 |
| Rapley Hut | 0.85 (985/1159) | 0.85 (0.83, 0.88) | 1.85 (1.15, 2.96), p= 0.0105 |
| West African Hut | 0.60 (15/25) | 0.55 (0.35, 0.75) | 0.35 (0.13, 0.94), p= 0.0364 |
